# Supplementary material for: Hematite nanodiscs exposing (001) facets: synthesis, formation mechanism and application for Li-ion batteries
Source: Royal Society of Chemistry journal article supplement (doi:10.1039/c3ta01539d), 2013-01-01
Supplement: c3ta01539d.pdf [file c3ta01539d.pdf]

Electronic Supplementary Information

## Hematite nanodiscs exposing (001) facet: Synthesis, formation mechanism and application for Li-ion battery

Jun Lu, Qing Peng\*, Zhongying Wang, Caiyun Nan, Lihong Li and Yadong Li

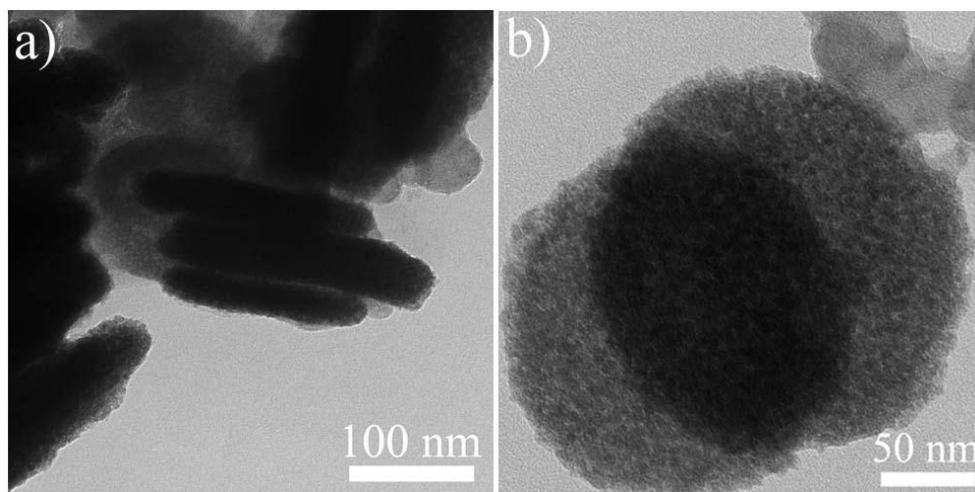

Fig. ESI 1 TEM images of  $\text{Fe}_2\text{O}_3$  nanodiscs after cycling. The nanodiscs generally maintained the morphology and size after the electrochemical cycling, but their became porous and their smooth surface became rough due to the conversion reaction.
